# Supplementary material for: Deciphering the regulatory landscape of fetal and adult γδ T‐cell development at single‐cell resolution
Source: PubMed Central journal article supplement (PMC7327493; doi:10.15252/embj.2019104159), 2020-06-08
Supplement: EMBJ-39-e104159-s002.pdf [file EMBJ-39-e104159-s002.pdf]

## Expanded View Figures

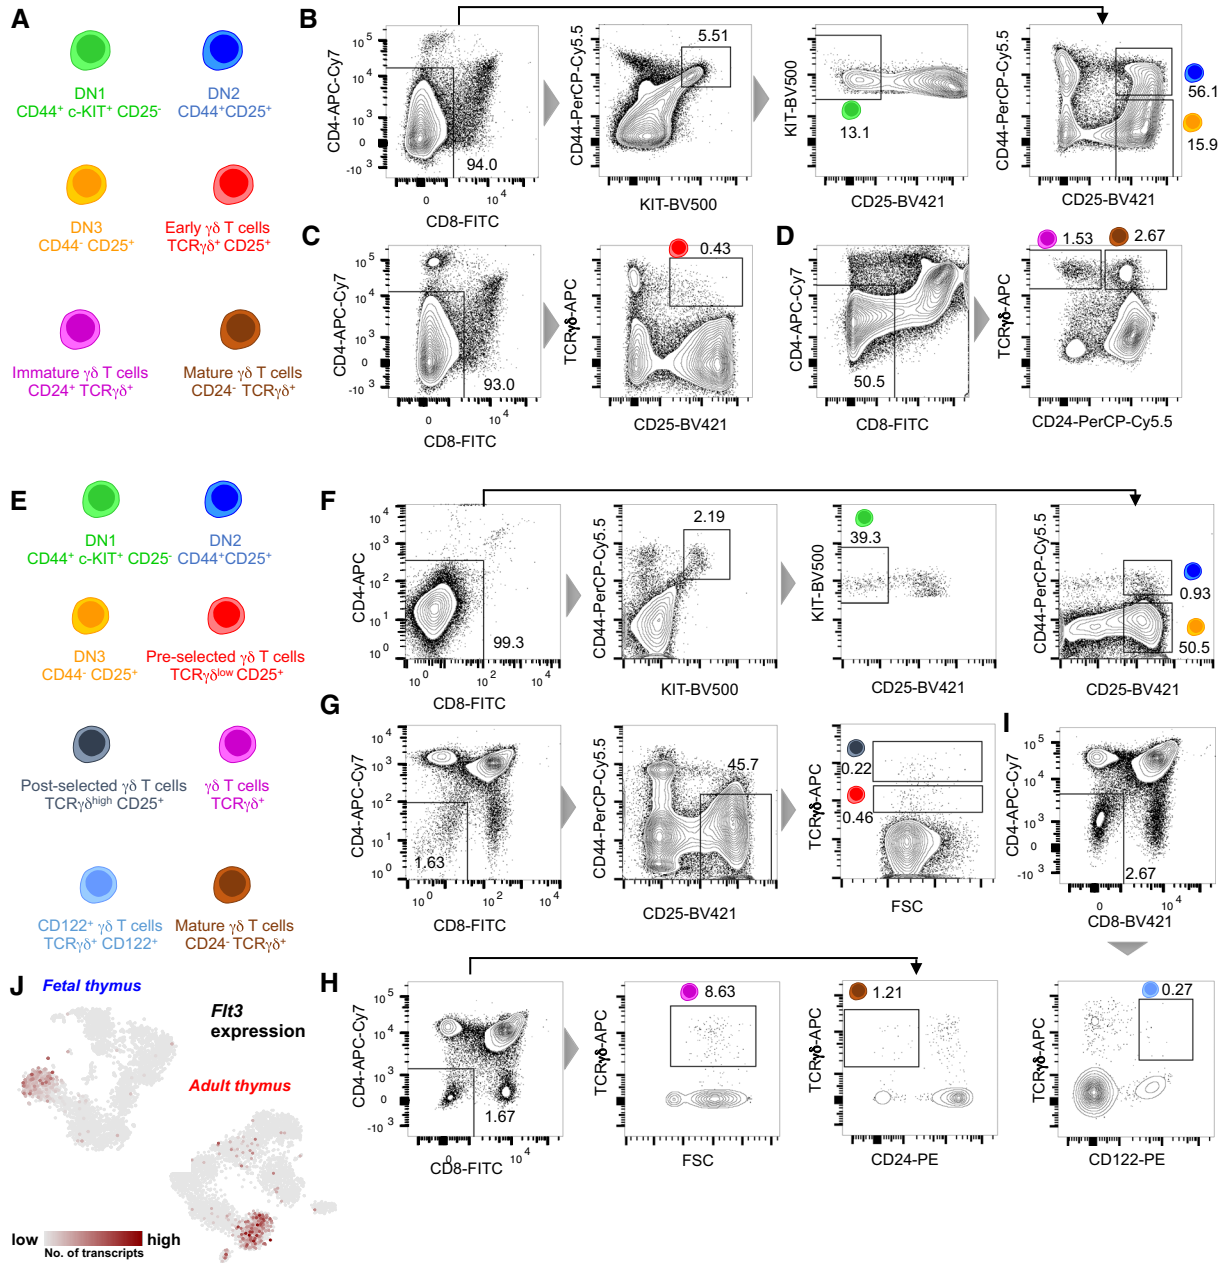

**Figure EV1. FACS strategy for scRNA-seq experiments.**

- A Sketch showing different cell types sorted for scRNA-seq experiments and the associated cell surface markers used from the fetal thymus.
- B–D FACS plots showing the gates used for sorting (B) c-KIT $^+$  DN1, DN2, and DN3 T cells, (C) CD25 $^+$   $\gamma\delta$  T cells, and (D) CD24 $^+$  immature and CD24 $^-$  mature  $\gamma\delta$  T cells from fetal thymus.
- E Sketch showing different cell types sorted for scRNA-seq experiments and the associated cell surface markers used from the adult thymus.
- F FACS plots showing the gates used for sorting c-KIT $^+$  DN1, DN2, and DN3 T cells from the adult thymus. Note that before sorting DN1–DN3 populations, thymocytes were enriched for DN populations using magnetic cell enrichment.
- G, H FACS plots showing the gates used for sorting (G) pre-selected and post-selected  $\gamma\delta$  T cells and (H) pan  $\gamma\delta$  T cells and CD24 $^-$  mature  $\gamma\delta$  T cells from the adult thymus. Note that > 98% of the pan  $\gamma\delta$  T cells are immature  $\gamma\delta$  T cells.
- I FACS plots showing the gates used for sorting CD122 $^+$   $\gamma\delta$  T cells from the adult thymus
- J t-SNE representation of the fetal and adult data showing the expression of *Fit3*.

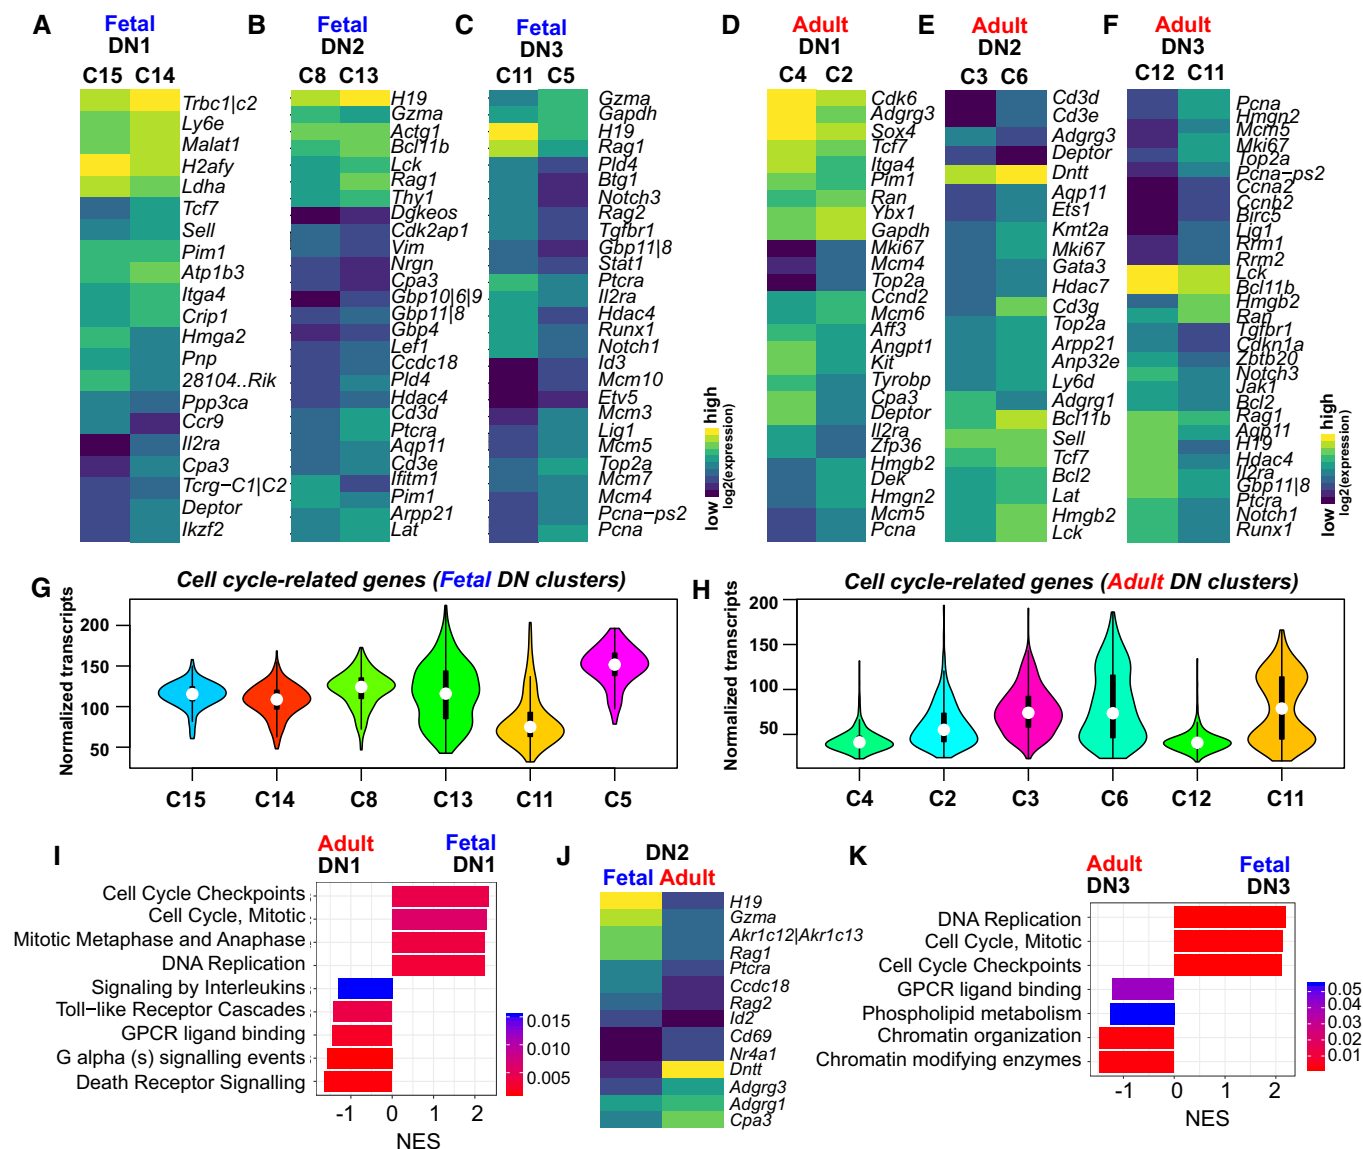

**Figure EV2. Transcriptional heterogeneity in the double negative T-cell progenitors from the fetal and adult thymus.**

A–F Heatmap showing the differentially expressed genes between (A) fetal c-KIT<sup>+</sup> DN1 clusters, (B) fetal DN2 clusters, (C) fetal DN3 clusters, (D) adult c-KIT<sup>+</sup> DN1 clusters, (E) adult DN2 clusters, and (F) adult DN3 clusters. Shortlisted genes had adjusted *P* < 0.05.

G, H Violin plots showing the aggregated normalized transcript counts for cell cycle-related genes in (G) fetal and (H) adult DN1–DN3 enriched clusters.

I GSEA of differentially expressed genes between fetal and adult c-KIT<sup>+</sup> DN1s. The bar chart shows the normalized enrichment score (NES) and highlights the *P*-value.

J Heatmap showing the differentially expressed genes between fetal and adult DN2s (shortlisted genes had adjusted *P* < 0.05).

K GSEA of differentially expressed genes between fetal and adult DN3s. The bar chart shows the normalized enrichment score (NES) and highlights the *P*-value.

**Figure EV3. Transcriptional heterogeneity of fetal and adult  $\gamma\delta$  T cells at various stages of differentiation.**

- A t-SNE representations of the fetal thymus dataset showing the weights for adult cluster 8 expressing high TCR signaling-related genes and cluster 9 expressing  $\gamma\delta$ T17-biased genes. Weights were calculated using quadratic programming. Color scale represents weights on the scale of 0–1.
- B, C t-SNE representation showing the expression of selected genes in (B) fetal and (C) adult  $\gamma\delta$  T-cell progenitors comprising immature and mature  $\gamma\delta$  T-cell compartments.
- D t-SNE representation showing the expression of *Rorc*. Note that mature *Rorc*<sup>+</sup> cells exhibit mutually exclusive expression of *Scart1* and *Scart2*. *Scart1*<sup>+</sup> cells are *Zbtb16*<sup>+</sup>.
- E t-SNE representation of the adult thymus dataset showing the weights for fetal *Gzma* (cluster 1), *Rorc* (clusters 3 and 23) and *Il2rb* (cluster 6) clusters calculated using quadratic programming. Color scale represents weights on the scale of 0–1.
- F UMAP representation showing the expression of key marker genes in the integrated fetal and adult dataset.

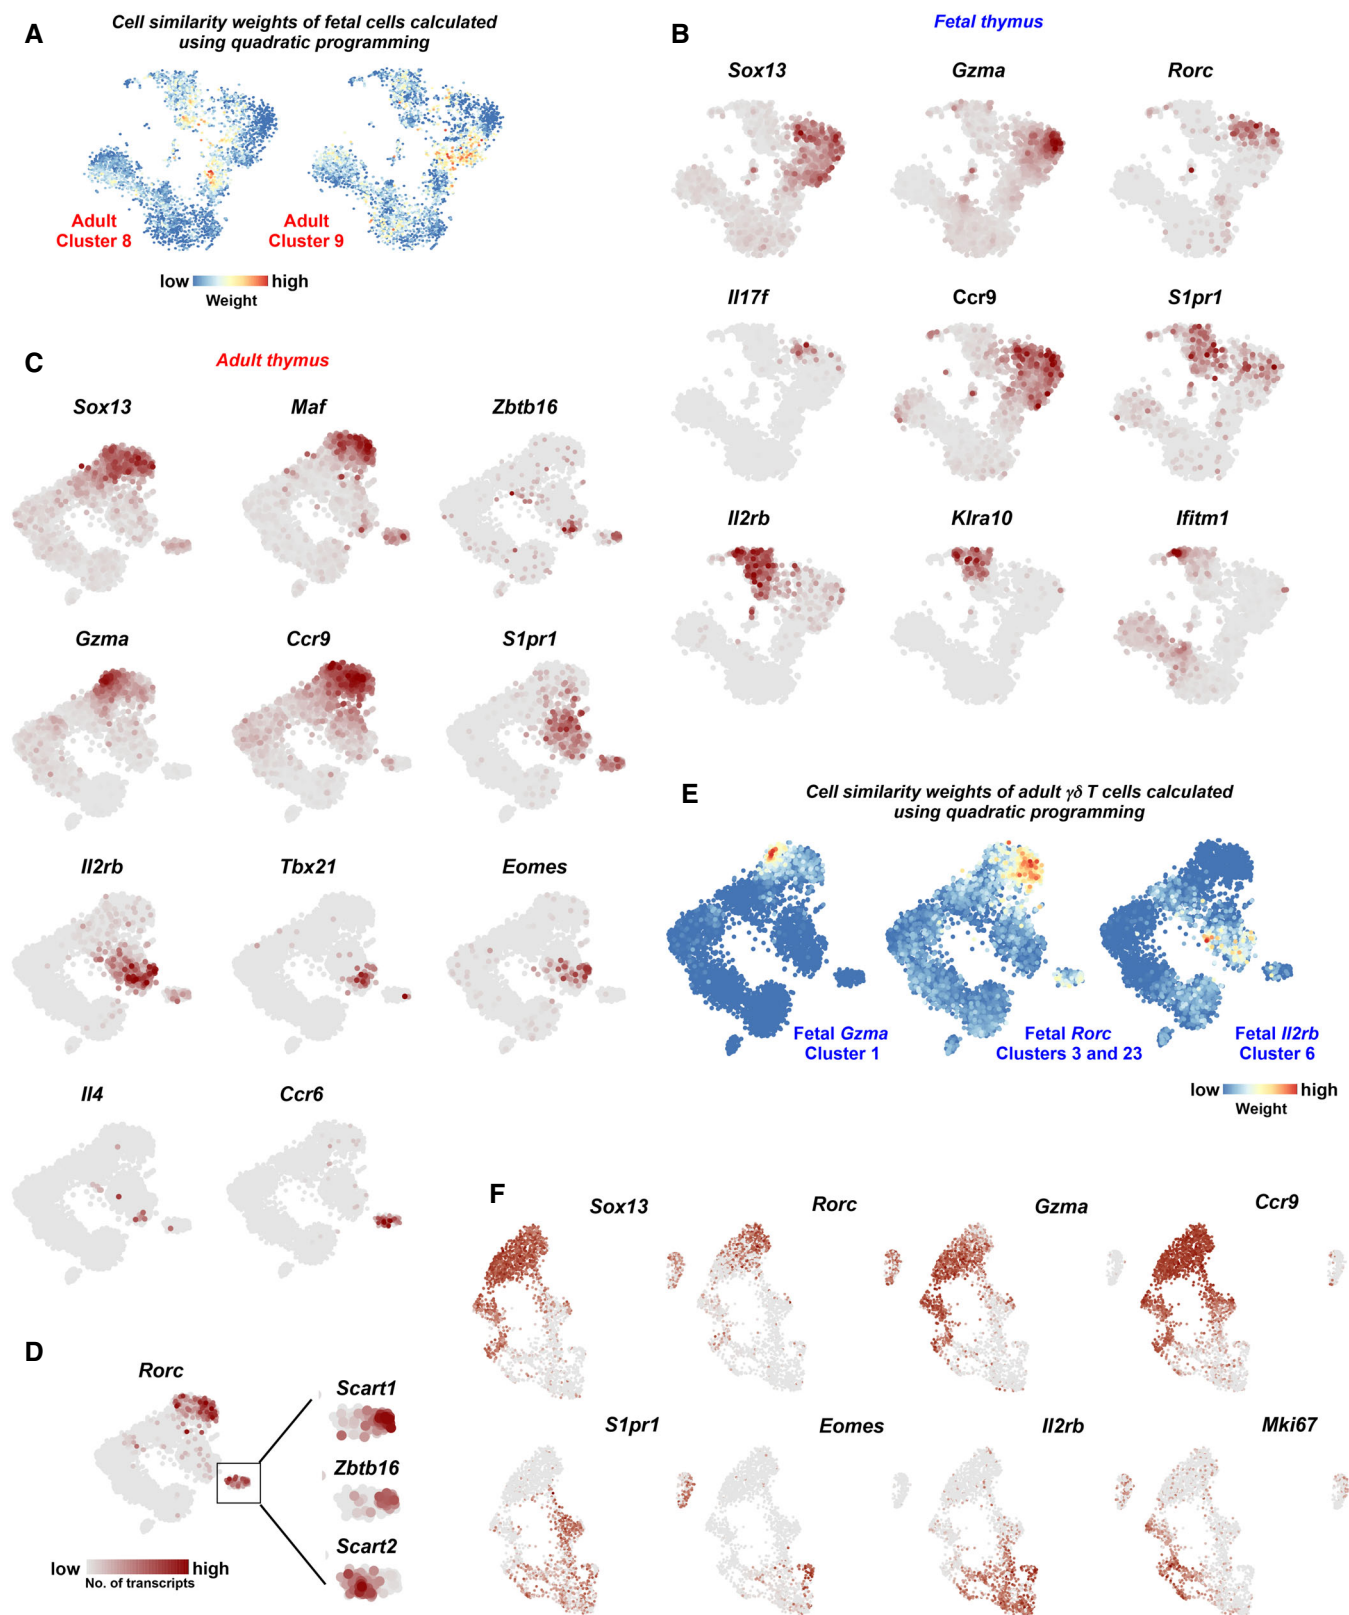

Figure EV3.

**Figure EV4. scRNA-seq of fetal and adult  $\gamma\delta$  T cells expressing different variable chains.**

- A, B t-SNE representation based on transcriptome similarities showing (A) fetal ( $n = 1$  independent experiment, eight embryos from one female mouse) and (B) adult ( $n = 1$  independent experiment from one 6-week-old female mouse) immature and mature  $\gamma\delta$  T-cell types sorted for different variable chains depicted in different colors. Cells from the original datasets are highlighted in gray.
- C–H Pie charts showing the contribution of immature and mature (C) fetal  $V\gamma 1^+$ , (D) fetal  $V\gamma 5^+$ , (E) fetal pan  $V\gamma 4^+$ , (F) adult  $V\gamma 1^+$ , (G) adult pan  $V\gamma 4^+$ , and (H)  $V\gamma 1^+V\delta 6.3^+$   $\gamma\delta$  T cells to the different sub-types in the immature ( $CD24^+$ ) and mature ( $CD24^-$ ) compartments in the thymus.
- I, J t-SNE representation showing the expression of key marker genes in (I) fetal and (J) adult data.

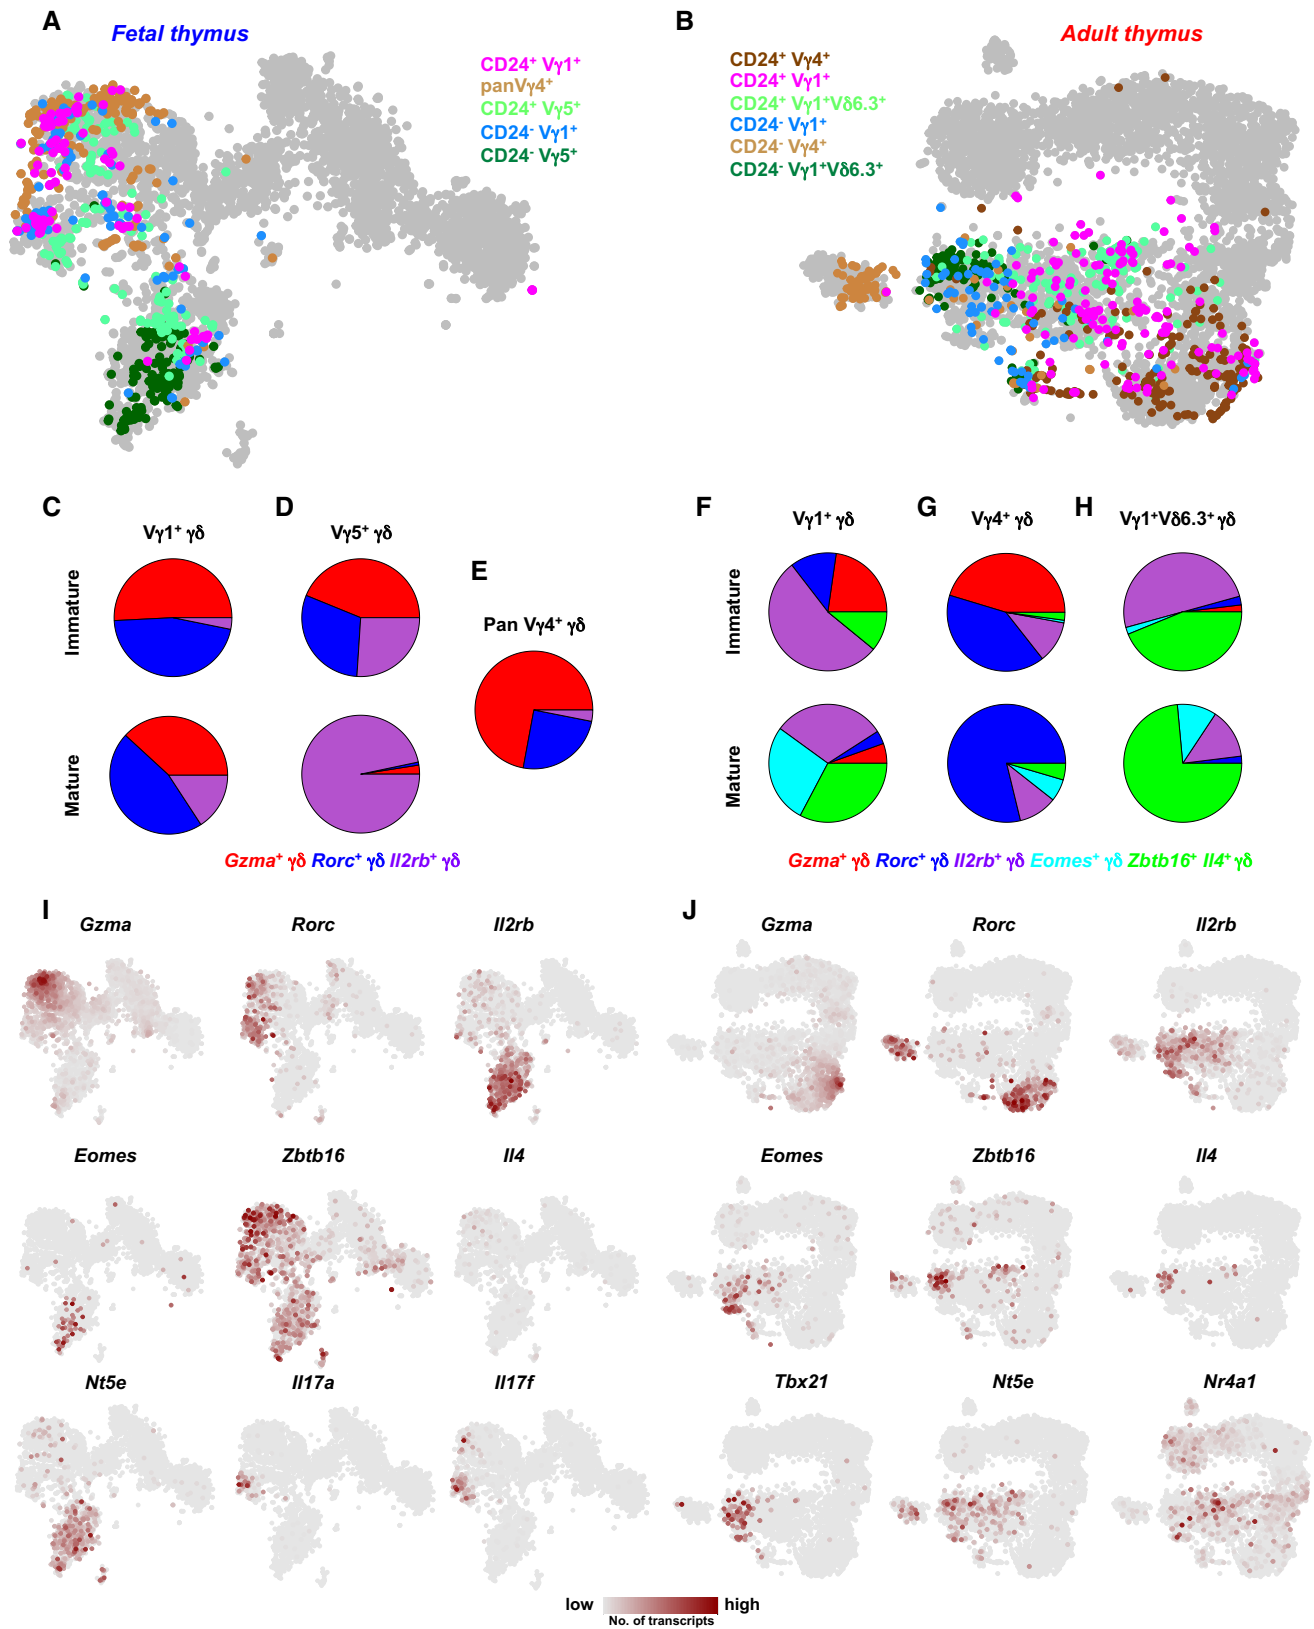

Figure EV4.

**Figure EV5. Reconstruction of fetal and adult  $\gamma\delta$  T-cell differentiation trajectories identified co-regulated gene modules expressed at different stages of development.**

- A SOM of z-score-transformed, pseudo-temporal expression profiles along the fetal IL-17-producing  $\gamma\delta$  T-cell ( $\gamma\delta$ T17) differentiation trajectory. The color-coding at the bottom indicates the cluster of origin. The SOM identified 17 different modules of co-regulated genes.
- B Pseudo-temporal expression profiles of transcription factors, as well as receptors, cell surface markers, and secreted proteins with known and unknown functions activated during fetal  $\gamma\delta$ T17 differentiation. Y-axis represents aggregated normalized counts of genes. X-axis represents the pseudo-temporal order. The lines indicate the pseudo-temporal expression values derived by a local regression of expression values across the pseudo-temporal order.
- C SOM of z-score-transformed, pseudo-temporal expression profiles along the fetal IFN- $\gamma$ -producing  $\gamma\delta$  T-cell differentiation trajectory. The SOM identified 20 different modules of co-regulated genes. The color-coding at the bottom indicates the cluster of origin.
- D Pseudo-temporal expression profiles of transcription factors, as well as receptors, cell surface markers, and secreted proteins with known and unknown functions activated during fetal IFN- $\gamma$ -producing  $\gamma\delta$  T-cell differentiation. Y-axis represents aggregated normalized counts of genes. X-axis represents the pseudo-temporal order. The lines indicate the pseudo-temporal expression values derived by a local regression of expression values across the pseudo-temporal order.
- E List of transcription factors, receptors, cell surface markers, and secreted proteins upregulated during fetal  $\gamma\delta$ T17 differentiation along the pseudo-temporal order shown in Fig. EV5A.
- F List of transcription factors, receptors, cell surface markers, and secreted proteins upregulated during fetal IFN- $\gamma$ -producing  $\gamma\delta$  T-cell differentiation along the pseudo-temporal order shown in Fig. EV5C.
- G, H SOM of z-score-transformed, pseudo-temporal expression profiles along the adult (G)  $\gamma\delta$ T17 and (H) IFN- $\gamma$ -producing  $\gamma\delta$  T-cell differentiation trajectories. The color-coding at the bottom indicates the cluster of origin. The SOM identified 22 and 31 different modules of co-regulated genes, respectively.
- I, J Pseudo-temporal expression profiles of transcription factors, as well as receptors, cell surface markers, and secreted proteins with known and unknown functions activated during (I) adult  $\gamma\delta$ T17 and (J) IFN- $\gamma$ -producing  $\gamma\delta$  T-cell differentiation. Y-axis represents aggregated normalized counts of genes. X-axis represents the pseudo-temporal order. The lines indicate the pseudo-temporal expression values derived by a local regression of expression values across the pseudo-temporal order.
- K, L GSEA of differentially expressed genes between (K) fetal and (L) adult  $\gamma\delta$ T17 and IFN- $\gamma$ -producing  $\gamma\delta$  T cells. The bar chart shows the normalized enrichment score (NES) and highlights the P-value.
- M t-SNE representations of fetal and adult data showing the aggregated expression of common histone-modifying factors identified in fetal and adult  $\gamma\delta$ T17 modules. Note the higher expression of the listed factors in DN3 cells undergoing recombination and *Rorc*<sup>+</sup>  $\gamma\delta$ T17 lineage cells.

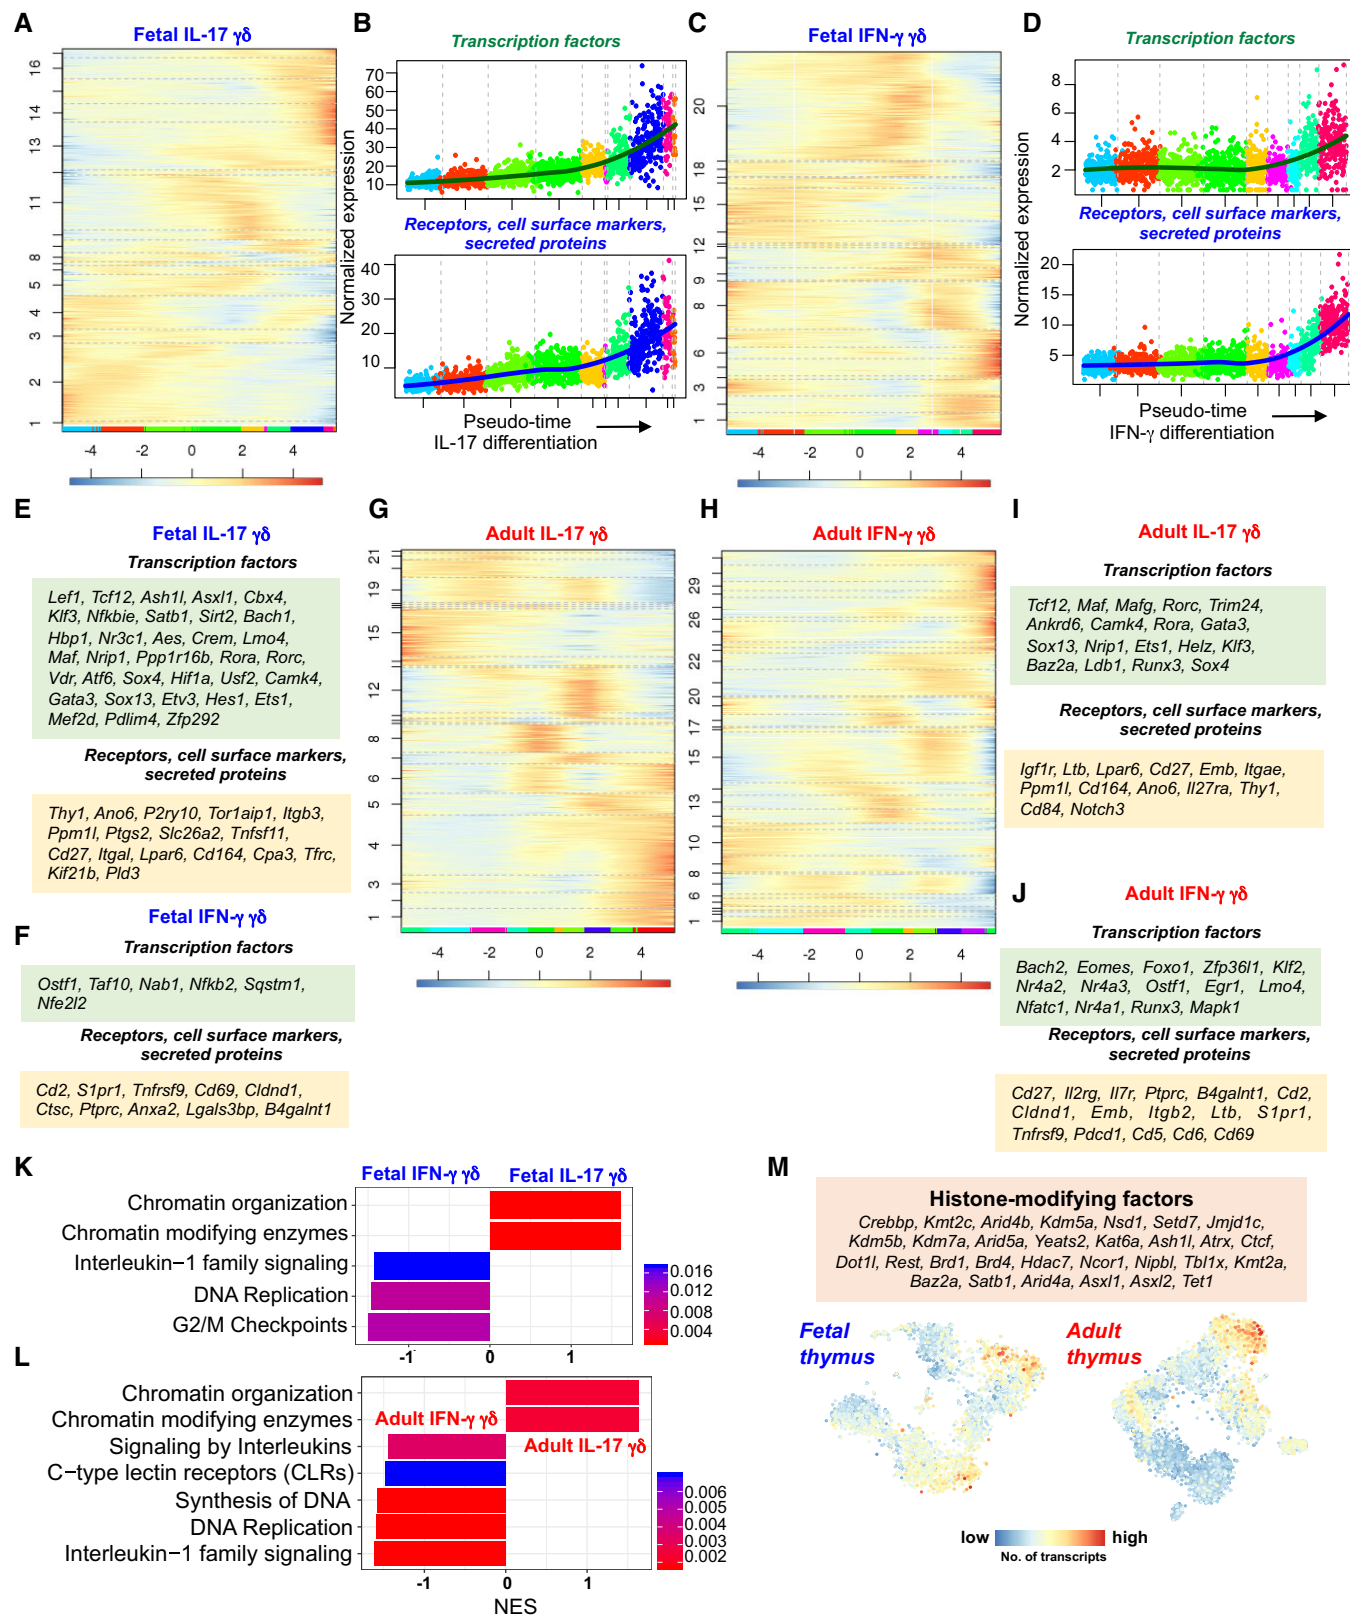

Figure EV5.
